# Supplementary material
Source: bioRxiv or medRxiv preprint supplement (https://www.biorxiv.org/highwire/filestream/86197/field_highwire_adjunct_files/0/280602-1.pdf)
Supplement: Supplementary file [file 280602-1.pdf]

1 **SUPPLEMENTARY MATERIAL for:**

2

3 **From proteins to polysaccharides; lifestyle and genetic evolution of**  
4 ***Coprothermobacter proteolyticus*.**

5

6 B.J. Kunath, F. Delogu, M.Ø. Arntzen, V.G.H. Eijsink, T.R. Hvidsten, P.B. Pope

7 This PDF file includes:

8 I. Supplementary Figures and Legends

9 II. Supplementary Tables and Legends

10 III. References cited in the Supplementary Material

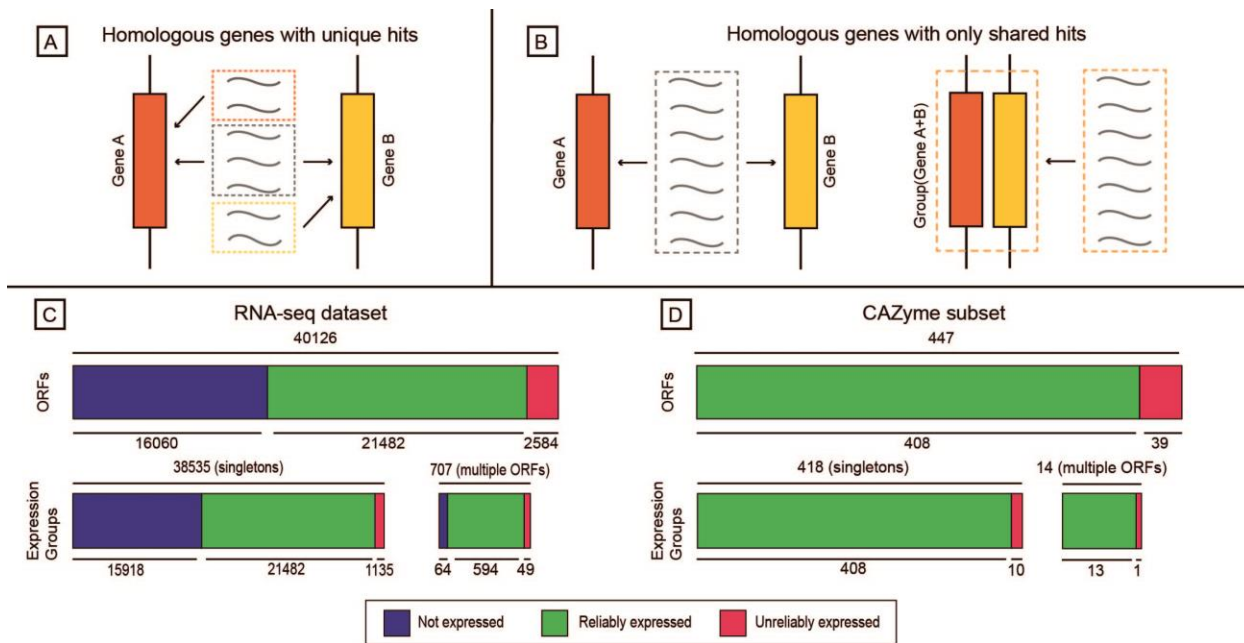

11  
12  
13  
14  
15  
16  
17  
18  
19  
20  
21  
22

**Supplementary Figure 1. Workflow used for RNA-seq quantification and generation of expression groups.** **A** and **B** illustrate (respectively) the grouping of genes when unique reads are present (**A**) and when there are not (**B**). In **A**, genes A and B are homologous, and a set of reads maps uniquely to either gene A or to gene B. The subsequent unique sets can be used to sort the ambiguous reads that map on both genes. In **B**, genes A and B are homologous and no unique reads map exclusively to either gene. The two genes cannot be separated and thus their expression cannot be reliably estimated. Instead of losing the information, the genes are merged into an expression group. **C** and **D** represent the effect of collapsing genes into expression groups on the total dataset (**C**), and the reduced dataset focused on CAZymes (**D**).

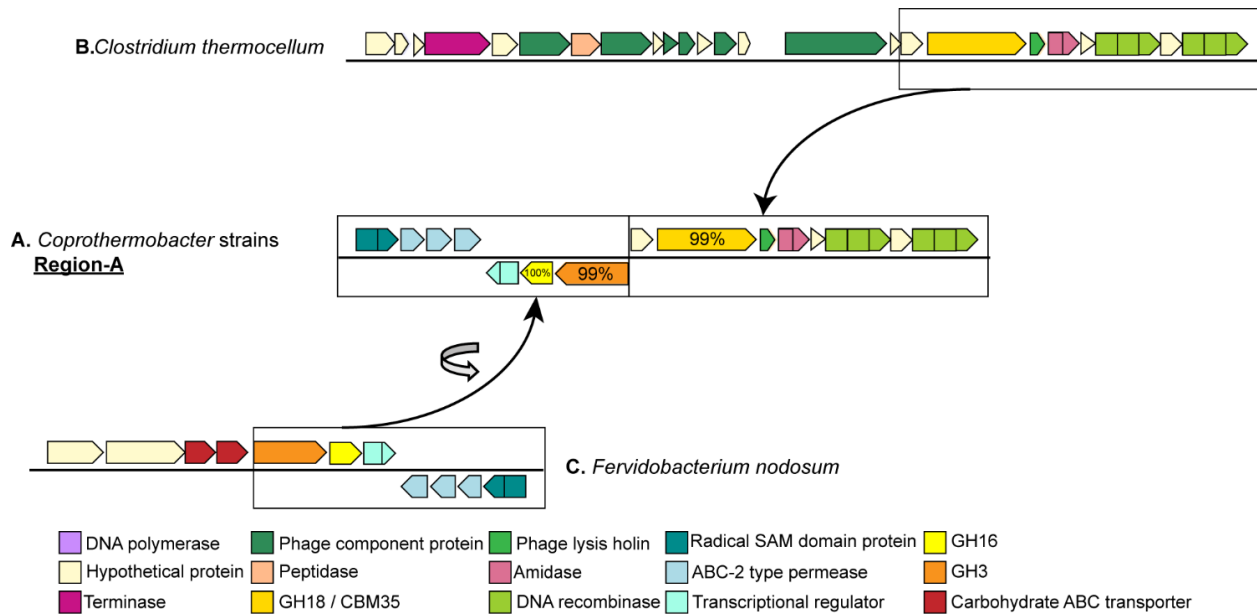

23  
24  
25  
26  
27  
28  
29

**Supplementary Figure 2. Gene synteny of CAZymes within region-A encoded in *BWF2A* and *SW3C* genomes. A, B and C represent the gene organization of CAZymes within region-A encoded in *BWF2A* and *SW3C* (see **Figure 3**), as well as similar operons found in *C. thermocellum* and *Fervidobacterium nodosum*. Gene similarity is indicated in selected examples, and can be found in detail in **Supplementary Table 5**.**

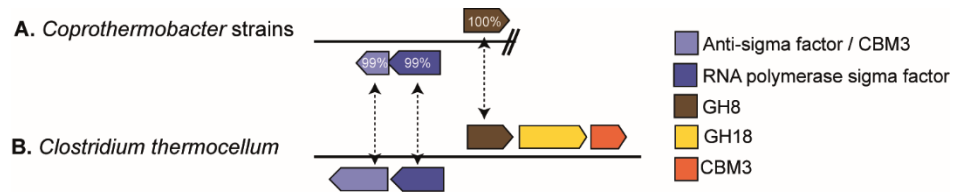

30  
 31  
 32  
 33  
 34

**Supplementary Figure 3. Gene organization of selected cellulosomal genes found in the *BWF2A* (A), compared against a similar operon found in *C. thermocellum* (B). Gene similarity is indicated.**

35 **Supplementary Table 1. Anaerobic biogas reactors with reported *Coprothermobacter***  
 36 ***proteolyticus*-affiliated populations.** Date, location, reactor substrate and the presence  
 37 /absence of cellulose are listed. The SEM1b consortium from this study is highlighted in  
 38 yellow.

| Date | Location     | Substrate                                | Cellulose   | Hemicellulose | 16S | Reference                        |
|------|--------------|------------------------------------------|-------------|---------------|-----|----------------------------------|
| 2018 | Norway I     | Cellulose (C)                            | YES (88.3%) | YES (9.3 %)   | YES | This study                       |
| 2017 | Denmark      | Food waste, Grass clippings (FW, C)      | YES         | YES           | YES | (Fitamo <i>et al.</i> , 2017)    |
| 2017 | Singapore    | wastewater treatment plant sludge (S)    | YES         | n.a.          | YES | (Chen <i>et al.</i> , 2017)      |
| 2017 | Japan I      | Acetate/sludge (Ac/S)                    | NO          | NO            | YES | (Kouzuma <i>et al.</i> , 2017)   |
| 2016 | Norway II    | Food waste (FW)                          | YES         | YES           | YES | (Hagen <i>et al.</i> , 2017)     |
| 2016 | Korea        | Seaweeds (SW)                            | YES         | NO            | YES | (Azizi <i>et al.</i> , 2016)     |
| 2016 | Australia I  | wastewater treatment plant sludge (S)    | n.a.        | n.a.          | YES | (Ho <i>et al.</i> , 2016)        |
| 2016 | China I      | Food waste (FW)                          | Yes         | n.a.          | YES | (Chen <i>et al.</i> , 2016)      |
| 2015 | Michigan     | wastewater treatment plant sludge (S)    | n.a.        | n.a.          | YES | (Sun <i>et al.</i> , 2015)       |
| 2015 | China II     | wastewater treatment plant sludge (S)    | n.a.        | n.a.          | YES | (Yu <i>et al.</i> , 2015)        |
| 2015 | Roma Italy   | wastewater treatment plant sludge (S)    | NO          | NO            | YES | (Gagliano <i>et al.</i> , 2015)  |
| 2014 | France       | Municipal Solid Waste / Office Paper (C) | YES (70%)   | YES (30%)     | YES | (Lü <i>et al.</i> , 2014)        |
| 2013 | Australia II | wastewater treatment plant sludge (S)    | n.a.        | n.a.          | YES | (Pervin <i>et al.</i> , 2013)    |
| 2008 | Japan II     | wastewater treatment plant sludge (S)    | NO          | NO            | YES | (Kobayashi <i>et al.</i> , 2008) |

39 **Supplementary Table 2. 16S rRNA analysis of the SEM1b consortium.** Taxonomic  
 40 composition of two separate samples (D1B and D2B), collected from a continuous SEM1b  
 41 culture. D2B is 15 generations older than D1B. Consensus lineage was determined via QIIME.  
 42 Closest relatives were determined using BLASTn.

| OTU ID  | D1B (%)          | D2B (%)          | Average (%) | Consensus Lineage             | Closest relative (BlastN)       |
|---------|------------------|------------------|-------------|-------------------------------|---------------------------------|
| OTU-1.1 | 55.3 (+/- 2.4)   | 45.2 (+/- 0.2)   | 50.2        | <i>Clostridium</i>            | <i>C. thermocellum</i>          |
| OTU-2.1 | 26.5 (+/- 1.3)   | 31.4 (+/- 0.1)   | 29          | <i>Coprothermobacter</i>      | <i>C. proteolyticus</i>         |
| OTU-2.2 | 10.6 (+/- 0.3)   | 12.6 (+/- 0.1)   | 11.6        | <i>Coprothermobacter</i>      | <i>C. proteolyticus</i>         |
| OTU-3.1 | 0                | 6.9 (+/- 0.04)   | 3.5         | <i>Anaerobaculum</i>          | <i>Acetomicrobium mobile</i>    |
| OTU-4   | 1.5 (+/- 0.2)    | 2.8 (+/- 0.1)    | 2.2         | <i>Tepidimicrobium</i>        | <i>Tepidimicrobium</i>          |
| OTU-5   | 3.7 (+/- 1)      | 0                | 1.9         | <i>Clostridium</i>            | <i>Uncultured bacterium</i>     |
| OTU-2.3 | 0.4 (+/- 0.1)    | 0.4 (+/- 0.03)   | 0.4         | <i>Coprothermobacter</i>      | <i>C. proteolyticus</i>         |
| OTU-3.2 | 0                | 0.6 (+/- 0)      | 0.3         | <i>Anaerobaculum</i>          | <i>Uncultured Anaerobaculum</i> |
| OTU-6.1 | 1.2 (+/- 0.2)    | 0                | 0.6         | <i>Thermoanaerobacterales</i> | <i>Tepidanaerobacter</i>        |
| OTU-6.2 | 0.7 (+/- 0.2)    | 0                | 0.35        | <i>Thermoanaerobacterales</i> | <i>Tepidanaerobacter</i>        |
| OTU-1.2 | 0.1 (+/- 0)      | 0                | 0.05        | <i>Clostridium</i>            | <i>C. thermocellum</i>          |
| OTU-7   | 0.02 (+/- 0.006) | 0.02 (+/- 0.005) | 0.02        | <i>Methanothermobacter</i>    | <i>Methanothermobacter</i>      |

43 **Supplementary Table 3. CheckM and ANI analyses.** Statistics of the metagenome-  
 44 recovered genomes (MAGs) from the SEM1b consortium as assessed by CheckM and average  
 45 nucleotide identities (ANI), which were calculated against their closest relative.

| MAG Id          | Completeness | Contamination | Heterogeneity | Size (Mb) | Closest relative                                        | ANI (%) |
|-----------------|--------------|---------------|---------------|-----------|---------------------------------------------------------|---------|
| RCL01           | 98.7         | 0.0           | 0.0           | 3.2       | <i>C. thermocellum</i><br>ATCC27405                     | 99.8    |
| COPR1           | 98.2         | 5.4           | 100.0         | 1.8       | <i>C proteolyticus</i> DSM5265                          | 97.8    |
| COPR2           | 0.0          | 0.0           | 0.0           | 0.3       | n.a.                                                    | n.a.    |
| COPR3           | 0.0          | 0.0           | 0.0           | 0.3       | n.a.                                                    | n.a.    |
| SYNG1           | 86.4         | 0.0           | 0.0           | 1.4       | <i>Acetomicrobium mobile</i><br>DSM13181                | 98.6    |
| SYNG2           | 13.6         | 5.1           | 100.0         | 0.8       | n.a.                                                    | n.a.    |
| TISS1           | 97.9         | 0.0           | 0.0           | 2.1       | <i>Tepidimicrobium</i><br><i>xylanilyticum</i> DSM23310 | 75.1    |
| TEPI1           | 82.2         | 1.7           | 0.0           | 1.9       | <i>Tepidanaerobacter</i><br><i>acetatoxydans</i> Re1    | 74.4    |
| TEPI2           | 87.0         | 11.8          | 14.3          | 2.4       | <i>Tepidanaerobacter</i><br><i>acetatoxydans</i> Re1    | 74.6    |
| CLOS1           | 98.6         | 1.4           | 0.0           | 3.0       | <i>Clostridium</i><br><i>Stercorarium</i> DSM8532       | 79.1    |
| METH1           | 99.9         | 0.0           | 0.0           | 1.7       | <i>Methanothermobacter</i><br><i>thermautrophicus</i>   | 98.2    |
| <i>Unbinned</i> |              |               |               | 7.7       | n.a.                                                    | n.a.    |

46 **Supplementary Table 4. CAZyme profiles for selected MAGs and genomes.** The total  
 47 number of annotated domains per CAZy family for each SEM1b MAG/genome are listed. \*  
 48 CAZyme profile for *C. proteolyticus* DSM 5265

| CAZy family | RCL01 | CLOS1 | TISS1 | COPR1 | COPR2 | COPR3 | BWF2A | SW3C | DSM5265* |
|-------------|-------|-------|-------|-------|-------|-------|-------|------|----------|
| AA3         | 0     | 0     | 2     | 0     | 0     | 0     | 0     | 0    | 0        |
| AA6         | 3     | 1     | 3     | 0     | 0     | 0     | 0     | 0    | 0        |
| CBM3        | 24    | 0     | 0     | 0     | 0     | 0     | 2     | 1    | 0        |
| CBM4        | 8     | 0     | 0     | 0     | 0     | 0     | 0     | 0    | 0        |
| CBM6        | 15    | 2     | 0     | 0     | 0     | 0     | 0     | 0    | 0        |
| CBM9        | 0     | 1     | 0     | 0     | 0     | 0     | 0     | 0    | 0        |
| CBM11       | 1     | 0     | 0     | 0     | 0     | 0     | 0     | 0    | 0        |
| CBM13       | 2     | 0     | 0     | 0     | 0     | 0     | 0     | 0    | 0        |
| CBM16       | 5     | 1     | 0     | 0     | 0     | 0     | 0     | 0    | 0        |
| CBM22       | 4     | 3     | 0     | 0     | 0     | 0     | 0     | 0    | 0        |
| CBM25       | 3     | 1     | 0     | 0     | 0     | 0     | 0     | 0    | 0        |
| CBM30       | 4     | 0     | 0     | 0     | 0     | 0     | 0     | 0    | 0        |
| CBM31       | 1     | 0     | 0     | 0     | 0     | 0     | 0     | 0    | 0        |
| CBM32       | 3     | 1     | 0     | 0     | 0     | 0     | 0     | 0    | 0        |
| CBM34       | 1     | 0     | 0     | 0     | 0     | 0     | 1     | 1    | 0        |
| CBM35       | 6     | 1     | 0     | 0     | 0     | 0     | 1     | 1    | 0        |
| CBM37       | 2     | 1     | 0     | 0     | 0     | 0     | 0     | 0    | 0        |
| CBM40       | 1     | 0     | 0     | 0     | 0     | 0     | 0     | 0    | 0        |
| CBM42       | 2     | 0     | 0     | 0     | 0     | 0     | 0     | 0    | 0        |
| CBM44       | 4     | 0     | 0     | 0     | 0     | 0     | 0     | 0    | 0        |
| CBM48       | 3     | 2     | 0     | 0     | 0     | 0     | 0     | 0    | 0        |
| CBM50       | 15    | 10    | 10    | 0     | 0     | 0     | 0     | 0    | 0        |
| CBM54       | 1     | 1     | 0     | 0     | 0     | 1     | 0     | 0    | 0        |
| CBM62       | 1     | 0     | 0     | 0     | 0     | 0     | 0     | 0    | 0        |
| CBM66       | 0     | 1     | 0     | 1     | 0     | 0     | 0     | 1    | 0        |
| CBM67       | 0     | 2     | 0     | 0     | 0     | 0     | 0     | 0    | 0        |
| CE1         | 3     | 2     | 1     | 2     | 0     | 0     | 2     | 2    | 0        |
| CE2         | 1     | 0     | 0     | 0     | 0     | 0     | 0     | 0    | 0        |
| CE3         | 2     | 1     | 0     | 0     | 0     | 0     | 0     | 0    | 0        |
| CE4         | 5     | 6     | 3     | 4     | 0     | 0     | 2     | 3    | 2        |
| CE6         | 1     | 0     | 0     | 0     | 0     | 0     | 0     | 0    | 0        |
| CE7         | 1     | 2     | 0     | 0     | 0     | 0     | 0     | 0    | 0        |
| CE8         | 1     | 1     | 0     | 0     | 0     | 0     | 0     | 0    | 0        |
| CE9         | 1     | 2     | 0     | 2     | 0     | 0     | 2     | 2    | 2        |
| CE10        | 2     | 3     | 2     | 1     | 0     | 0     | 1     | 1    | 0        |
| CE12        | 2     | 1     | 0     | 0     | 0     | 0     | 0     | 0    | 0        |
| CE14        | 1     | 0     | 0     | 1     | 0     | 0     | 1     | 1    | 0        |
| CE15        | 0     | 2     | 0     | 0     | 0     | 0     | 0     | 0    | 0        |
| cohesin     | 17    | 0     | 0     | 0     | 0     | 0     | 0     | 0    | 0        |
| dockerin    | 61    | 1     | 0     | 0     | 0     | 0     | 4     | 0    | 0        |
| GH1         | 2     | 1     | 0     | 0     | 0     | 0     | 0     | 0    | 0        |
| GH2         | 1     | 7     | 0     | 0     | 0     | 0     | 0     | 0    | 0        |
| GH3         | 2     | 5     | 1     | 0     | 0     | 0     | 1     | 1    | 1        |
| GH4         | 0     | 5     | 0     | 0     | 0     | 1     | 0     | 0    | 0        |



|              |    |    |   |   |   |   |   |   |   |
|--------------|----|----|---|---|---|---|---|---|---|
| <b>GH5</b>   | 10 | 1  | 0 | 0 | 0 | 0 | 0 | 0 | 0 |
| <b>GH8</b>   | 1  | 0  | 0 | 0 | 0 | 0 | 2 | 1 | 0 |
| <b>GH9</b>   | 16 | 1  | 0 | 0 | 0 | 0 | 1 | 1 | 0 |
| <b>GH10</b>  | 5  | 4  | 0 | 0 | 0 | 0 | 0 | 0 | 0 |
| <b>GH11</b>  | 2  | 0  | 0 | 0 | 0 | 0 | 0 | 0 | 0 |
| <b>GH13</b>  | 2  | 3  | 0 | 1 | 0 | 0 | 2 | 2 | 2 |
| <b>GH15</b>  | 1  | 1  | 0 | 0 | 0 | 0 | 0 | 0 | 0 |
| <b>GH16</b>  | 2  | 0  | 0 | 0 | 0 | 0 | 1 | 1 | 0 |
| <b>GH18</b>  | 3  | 4  | 1 | 0 | 0 | 0 | 2 | 2 | 0 |
| <b>GH23</b>  | 2  | 2  | 1 | 3 | 0 | 0 | 3 | 3 | 3 |
| <b>GH26</b>  | 3  | 1  | 0 | 0 | 0 | 0 | 0 | 0 | 0 |
| <b>GH28</b>  | 1  | 1  | 0 | 0 | 0 | 0 | 0 | 0 | 0 |
| <b>GH29</b>  | 0  | 2  | 0 | 0 | 0 | 0 | 0 | 0 | 0 |
| <b>GH30</b>  | 1  | 1  | 0 | 0 | 0 | 0 | 0 | 0 | 0 |
| <b>GH31</b>  | 0  | 3  | 0 | 0 | 0 | 0 | 0 | 0 | 0 |
| <b>GH35</b>  | 0  | 2  | 0 | 0 | 0 | 0 | 0 | 0 | 0 |
| <b>GH36</b>  | 0  | 4  | 0 | 0 | 0 | 0 | 0 | 0 | 0 |
| <b>GH38</b>  | 0  | 2  | 0 | 0 | 0 | 0 | 0 | 0 | 0 |
| <b>GH39</b>  | 0  | 1  | 0 | 0 | 0 | 0 | 0 | 0 | 0 |
| <b>GH42</b>  | 0  | 2  | 0 | 0 | 0 | 0 | 0 | 0 | 0 |
| <b>GH43</b>  | 5  | 9  | 0 | 0 | 0 | 0 | 0 | 0 | 0 |
| <b>GH44</b>  | 1  | 0  | 0 | 0 | 0 | 0 | 0 | 0 | 0 |
| <b>GH48</b>  | 2  | 0  | 0 | 0 | 0 | 0 | 0 | 0 | 0 |
| <b>GH51</b>  | 1  | 3  | 0 | 0 | 0 | 0 | 0 | 0 | 0 |
| <b>GH53</b>  | 1  | 0  | 0 | 0 | 0 | 0 | 0 | 0 | 0 |
| <b>GH57</b>  | 0  | 0  | 0 | 3 | 0 | 0 | 3 | 3 | 3 |
| <b>GH63</b>  | 0  | 1  | 0 | 0 | 0 | 0 | 0 | 0 | 0 |
| <b>GH67</b>  | 0  | 1  | 0 | 0 | 0 | 0 | 0 | 0 | 0 |
| <b>GH73</b>  | 0  | 1  | 0 | 1 | 0 | 0 | 1 | 1 | 1 |
| <b>GH74</b>  | 3  | 0  | 0 | 4 | 0 | 0 | 2 | 2 | 0 |
| <b>GH78</b>  | 0  | 2  | 0 | 0 | 0 | 0 | 0 | 0 | 0 |
| <b>GH81</b>  | 1  | 0  | 0 | 0 | 0 | 0 | 0 | 0 | 0 |
| <b>GH88</b>  | 0  | 2  | 0 | 0 | 0 | 0 | 0 | 0 | 0 |
| <b>GH94</b>  | 3  | 1  | 1 | 0 | 0 | 0 | 0 | 0 | 0 |
| <b>GH95</b>  | 0  | 5  | 0 | 0 | 0 | 0 | 0 | 0 | 0 |
| <b>GH105</b> | 0  | 6  | 0 | 0 | 0 | 0 | 0 | 0 | 0 |
| <b>GH106</b> | 0  | 3  | 0 | 0 | 0 | 0 | 0 | 0 | 0 |
| <b>GH109</b> | 2  | 10 | 4 | 7 | 3 | 1 | 3 | 3 | 0 |
| <b>GH112</b> | 0  | 1  | 0 | 0 | 0 | 0 | 0 | 0 | 0 |
| <b>GH115</b> | 0  | 1  | 0 | 0 | 0 | 0 | 0 | 0 | 0 |
| <b>GH120</b> | 0  | 1  | 0 | 0 | 0 | 0 | 0 | 0 | 0 |
| <b>GH124</b> | 3  | 0  | 0 | 0 | 0 | 0 | 0 | 0 | 0 |
| <b>GH126</b> | 1  | 0  | 0 | 0 | 0 | 0 | 0 | 0 | 0 |
| <b>GH127</b> | 0  | 1  | 0 | 0 | 0 | 0 | 0 | 0 | 0 |
| <b>GH130</b> | 1  | 4  | 0 | 0 | 0 | 0 | 0 | 0 | 0 |
| <b>GH133</b> | 1  | 1  | 0 | 0 | 0 | 0 | 0 | 0 | 0 |
| <b>PL1</b>   | 2  | 0  | 0 | 0 | 0 | 0 | 0 | 0 | 0 |
| <b>PL9</b>   | 1  | 1  | 0 | 0 | 0 | 0 | 0 | 0 | 0 |

|              |     |     |    |    |   |   |    |    |    |
|--------------|-----|-----|----|----|---|---|----|----|----|
| <b>PL11</b>  | 1   | 1   | 0  | 0  | 0 | 0 | 0  | 0  | 0  |
| <b>PL12</b>  | 0   | 2   | 0  | 0  | 0 | 2 | 0  | 0  | 0  |
| <b>PL22</b>  | 0   | 1   | 0  | 0  | 0 | 0 | 0  | 0  | 0  |
| <b>Total</b> | 290 | 160 | 29 | 30 | 3 | 5 | 37 | 33 | 14 |

49 **Supplementary Table 5. Selected CAZymes that were acquired within BWF2A and**  
 50 **SW3C.** The CAZymes are listed for the two strains (IMG genome ID: 2731957509 and  
 51 2731957514, respectively) with their respective Gene IMG IDs. CAZymes found in region-A  
 52 **(Figure 3)** are shaded in purple. CAZy family assignment and similarity % with their closest  
 53 relative are indicated.

| Gene IMG ID (BWF2A)          | CAZy family | Best hit and similarity (%)  | Gene ID (SW3C)             | CAZy family | Best hit and similarity (%)  |
|------------------------------|-------------|------------------------------|----------------------------|-------------|------------------------------|
| 2731988480_Ga0187557_1002248 | GH16        | <i>F. nodosum</i> (100)      | 2731996536_Ga0187564_10674 | GH16        | <i>F. nodosum</i> (100)      |
| 2731988481_Ga0187557_1002249 | GH3         | <i>F. nodosum</i> (99)       | 2731996537_Ga0187564_10675 | GH3         | <i>F. nodosum</i> (99)       |
| 2731988483_Ga0187557_1002251 | GH18-CBM35  | <i>C. thermocellum</i> (99)  | 2731996539_Ga0187564_10677 | GH18-CBM35  | <i>C. thermocellum</i> (99)  |
| 2731989281_Ga0187557_10084   | GH8         | <i>C. thermocellum</i> (99)  | 2731996671_Ga0187564_1131  | GH36        | <i>C. thermocellum</i> (98)  |
| 2731989282_Ga0187557_10091   | GH9-doc     | <i>C. thermocellum</i> (99)  | 2731996673_Ga0187564_1133  | GH9         | <i>C. thermocellum</i> (100) |
| 2731989288_Ga0187557_10111   | GH36        | <i>C. thermocellum</i> (100) | 2731996687_Ga0187564_1201  | GH8         | <i>C. thermocellum</i> (99)  |
| 2731989293_Ga0187557_10122   | CBM3        | <i>C. thermocellum</i> (100) | 2731996693_Ga0187564_1232  | GH18-doc    | <i>C. thermocellum</i> (99)  |
| 2731989294_Ga0187557_10123   | GH18-doc    | <i>C. thermocellum</i> (96)  | 2731996702_Ga0187564_1292  | CBM3        | <i>C. thermocellum</i> (100) |
| 2731989310_Ga0187557_10201   | CBM3        | <i>C. thermocellum</i> (100) |                            |             |                              |
| 2731989313_Ga0187557_10212   | GH8-doc     | <i>C. thermocellum</i> (100) |                            |             |                              |

54 **Supplementary Table 6. Clusters of expression groups.** The table shows the gene IMG ID  
55 and the CAZy family assignment of each expression group together with the genome and  
56 cluster. Groups composed of several ORFs contain a “+” between the gene IDs and the names  
57 of the organisms. CAZymes in expression groups without uniquely mapping reads (unique  
58 hits) are not part of the clustering and were labelled as “n.a.”.

| Expression Groups (Gene IMG ID)    | CAZY     | Genome       | Cluster |
|------------------------------------|----------|--------------|---------|
| Ga0196617_10001933                 | CBM25    | RCL01        | I       |
| Ga0196617_100013115                | GH109    | TISS1        | I       |
| Ga0196617_1002411                  | GH109    | COPR2        | I       |
| Ga0196617_1002669                  | GH4      | COPR3        | I       |
| Ga0187557_1002157                  | GH109    | BWF2A        | I       |
| Ga0187557_1003280                  | GH73     | BWF2A        | I       |
| Ga0187564_102294                   | GH109    | SW3C         | I       |
| Ga0187564_103104                   | CE14     | SW3C         | I       |
| Ga0187564_104108                   | GH23     | SW3C         | I       |
| Ga0187564_10645                    | GH109    | SW3C         | I       |
| Ga0187564_10677                    | CBM35    | SW3C         | I       |
| Ga0187564_10677                    | GH18     | SW3C         | I       |
| Ga0187557_100270+Ga0187564_103120  | CE9      | SW3C + BWF2A | I       |
| Ga0196617_1000499                  | GH23     | COPR1        | II      |
| Ga0196617_1000628                  | CE9      | COPR1        | II      |
| Ga0196617_10022612                 | GH109    | COPR1        | II      |
| Ga0196617_1003256                  | CE1      | COPR1        | II      |
| Ga0196617_1006634                  | GH109    | COPR1        | II      |
| Ga0196617_1009191                  | GH109    | COPR1        | II      |
| Ga0187557_1002223                  | GH109    | BWF2A        | II      |
| Ga0187564_10257                    | SLH      | SW3C         | II      |
| Ga0187564_10257                    | SLH      | SW3C         | II      |
| Ga0187564_1201                     | GH8      | SW3C         | II      |
| Ga0187557_1002314+Ga0187564_106139 | CBM34    | SW3C + BWF2A | II      |
| Ga0187557_1002314+Ga0187564_106139 | GH13     | SW3C + BWF2A | II      |
| Ga0187564_101146+Ga0187557_1001161 | GH23     | SW3C + BWF2A | II      |
| Ga0196617_1000454                  | CBM6     | RCL01        | III     |
| Ga0196617_1000454                  | CE1      | RCL01        | III     |
| Ga0196617_1000454                  | dockerin | RCL01        | III     |
| Ga0196617_10009713                 | CBM50    | RCL01        | III     |
| Ga0196617_10014620                 | CE4      | COPR1        | III     |
| Ga0196617_1004347                  | GH74     | COPR1        | III     |
| Ga0196617_1005644                  | GH109    | COPR1        | III     |
| Ga0196617_10005857                 | AA6      | TISS1        | III     |
| Ga0187557_100358                   | SLH      | BWF2A        | III     |
| Ga0187557_100358                   | SLH      | BWF2A        | III     |
| Ga0187564_10258                    | SLH      | SW3C         | III     |
| Ga0187564_10258                    | SLH      | SW3C         | III     |
| Ga0187564_103147                   | GH57     | SW3C         | III     |
| Ga0187564_10471                    | GH13     | SW3C         | III     |
| Ga0187564_10493                    | CE4      | SW3C         | III     |
| Ga0196617_100009115                | CBM13    | RCL01        | IV      |

|                     |          |       |    |
|---------------------|----------|-------|----|
| Ga0196617_100009115 | GH43     | RCL01 | IV |
| Ga0196617_100009116 | dockerin | RCL01 | IV |
| Ga0196617_100009116 | dockerin | RCL01 | IV |
| Ga0196617_100009116 | GH81     | RCL01 | IV |
| Ga0196617_100009143 | CBM48    | RCL01 | IV |
| Ga0196617_100009158 | CBM3     | RCL01 | IV |
| Ga0196617_100009158 | GH9      | RCL01 | IV |
| Ga0196617_100009159 | CBM30    | RCL01 | IV |
| Ga0196617_100009159 | CBM44    | RCL01 | IV |
| Ga0196617_100009159 | GH44     | RCL01 | IV |
| Ga0196617_100009159 | GH9      | RCL01 | IV |
| Ga0196617_100009203 | CBM3     | RCL01 | IV |
| Ga0196617_100009203 | GH9      | RCL01 | IV |
| Ga0196617_100009224 | CE4      | RCL01 | IV |
| Ga0196617_10000923  | CBM3     | RCL01 | IV |
| Ga0196617_10000923  | dockerin | RCL01 | IV |
| Ga0196617_10000923  | GH9      | RCL01 | IV |
| Ga0196617_10000935  | cohesin  | RCL01 | IV |
| Ga0196617_10000935  | cohesin  | RCL01 | IV |
| Ga0196617_10000935  | cohesin  | RCL01 | IV |
| Ga0196617_10000935  | cohesin  | RCL01 | IV |
| Ga0196617_10000935  | cohesin  | RCL01 | IV |
| Ga0196617_10000935  | cohesin  | RCL01 | IV |
| Ga0196617_10000935  | cohesin  | RCL01 | IV |
| Ga0196617_10000936  | cohesin  | RCL01 | IV |
| Ga0196617_100014143 | CBM30    | RCL01 | IV |
| Ga0196617_100014143 | GH9      | RCL01 | IV |
| Ga0196617_100014145 | CBM32    | RCL01 | IV |
| Ga0196617_100014145 | dockerin | RCL01 | IV |
| Ga0196617_100014145 | GH5      | RCL01 | IV |
| Ga0196617_10001446  | dockerin | RCL01 | IV |
| Ga0196617_10001449  | CBM32    | RCL01 | IV |
| Ga0196617_10001451  | CBM22    | RCL01 | IV |
| Ga0196617_10001451  | CBM22    | RCL01 | IV |
| Ga0196617_10001451  | CE1      | RCL01 | IV |
| Ga0196617_10001451  | GH10     | RCL01 | IV |
| Ga0196617_1000146   | CBM25    | RCL01 | IV |
| Ga0196617_10001484  | GH23     | RCL01 | IV |
| Ga0196617_10001497  | AA6      | RCL01 | IV |
| Ga0196617_10001610  | CBM3     | RCL01 | IV |
| Ga0196617_10001610  | CBM40    | RCL01 | IV |
| Ga0196617_10001610  | SLH      | RCL01 | IV |
| Ga0196617_10001610  | SLH      | RCL01 | IV |
| Ga0196617_10001610  | SLH      | RCL01 | IV |
| Ga0196617_100016105 | SLH      | RCL01 | IV |
| Ga0196617_100016107 | SLH      | RCL01 | IV |
| Ga0196617_100016107 | SLH      | RCL01 | IV |
| Ga0196617_1000162   | CBM37    | RCL01 | IV |

|                     |          |       |    |
|---------------------|----------|-------|----|
| Ga0196617_1000162   | SLH      | RCL01 | IV |
| Ga0196617_1000162   | SLH      | RCL01 | IV |
| Ga0196617_1000162   | SLH      | RCL01 | IV |
| Ga0196617_10001654  | GH51     | RCL01 | IV |
| Ga0196617_10001684  | CBM22    | RCL01 | IV |
| Ga0196617_10001684  | dockerin | RCL01 | IV |
| Ga0196617_10001684  | dockerin | RCL01 | IV |
| Ga0196617_10001684  | GH10     | RCL01 | IV |
| Ga0196617_100019129 | CBM31    | RCL01 | IV |
| Ga0196617_10001939  | CE4      | RCL01 | IV |
| Ga0196617_100023113 | GH109    | RCL01 | IV |
| Ga0196617_10002318  | CBM11    | RCL01 | IV |
| Ga0196617_10002318  | dockerin | RCL01 | IV |
| Ga0196617_10002318  | dockerin | RCL01 | IV |
| Ga0196617_10002318  | GH26     | RCL01 | IV |
| Ga0196617_10002318  | GH5      | RCL01 | IV |
| Ga0196617_10002319  | GH5      | RCL01 | IV |
| Ga0196617_10002366  | GH1      | RCL01 | IV |
| Ga0196617_10002394  | GH53     | RCL01 | IV |
| Ga0196617_10002396  | GH74     | RCL01 | IV |
| Ga0196617_10002396  | GH74     | RCL01 | IV |
| Ga0196617_10002396  | GH74     | RCL01 | IV |
| Ga0196617_100024103 | CBM3     | RCL01 | IV |
| Ga0196617_100024106 | SLH      | RCL01 | IV |
| Ga0196617_100024106 | SLH      | RCL01 | IV |
| Ga0196617_100024106 | SLH      | RCL01 | IV |
| Ga0196617_100024109 | SLH      | RCL01 | IV |
| Ga0196617_100024109 | SLH      | RCL01 | IV |
| Ga0196617_100024109 | SLH      | RCL01 | IV |
| Ga0196617_10002441  | GH133    | RCL01 | IV |
| Ga0196617_10002447  | dockerin | RCL01 | IV |
| Ga0196617_10002490  | CBM3     | RCL01 | IV |
| Ga0196617_10002490  | GH48     | RCL01 | IV |
| Ga0196617_100025109 | SLH      | RCL01 | IV |
| Ga0196617_10002537  | dockerin | RCL01 | IV |
| Ga0196617_10002537  | dockerin | RCL01 | IV |
| Ga0196617_10002556  | CBM37    | RCL01 | IV |
| Ga0196617_100026113 | CBM4     | RCL01 | IV |
| Ga0196617_100026113 | dockerin | RCL01 | IV |
| Ga0196617_100026113 | GH28     | RCL01 | IV |
| Ga0196617_10002620  | GH10     | RCL01 | IV |
| Ga0196617_10002651  | dockerin | RCL01 | IV |
| Ga0196617_10002651  | dockerin | RCL01 | IV |
| Ga0196617_10002651  | GH48     | RCL01 | IV |
| Ga0196617_10003331  | CBM50    | RCL01 | IV |
| Ga0196617_10003331  | CBM50    | RCL01 | IV |
| Ga0196617_10003331  | GH18     | RCL01 | IV |
| Ga0196617_10003345  | GH15     | RCL01 | IV |

|                     |          |       |    |
|---------------------|----------|-------|----|
| Ga0196617_100035100 | CBM30    | RCL01 | IV |
| Ga0196617_100035100 | CBM3     | RCL01 | IV |
| Ga0196617_100035100 | CBM4     | RCL01 | IV |
| Ga0196617_100035100 | dockerin | RCL01 | IV |
| Ga0196617_100035100 | GH9      | RCL01 | IV |
| Ga0196617_100035101 | dockerin | RCL01 | IV |
| Ga0196617_100035101 | GH9      | RCL01 | IV |
| Ga0196617_10003560  | cohesin  | RCL01 | IV |
| Ga0196617_10003575  | dockerin | RCL01 | IV |
| Ga0196617_10003578  | GH124    | RCL01 | IV |
| Ga0196617_10003580  | CBM3     | RCL01 | IV |
| Ga0196617_10003580  | GH9      | RCL01 | IV |
| Ga0196617_10003947  | SLH      | RCL01 | IV |
| Ga0196617_10003947  | SLH      | RCL01 | IV |
| Ga0196617_10003947  | SLH      | RCL01 | IV |
| Ga0196617_10003956  | GH3      | RCL01 | IV |
| Ga0196617_10003979  | CBM50    | RCL01 | IV |
| Ga0196617_10004017  | GH94     | RCL01 | IV |
| Ga0196617_10004018  | dockerin | RCL01 | IV |
| Ga0196617_10004018  | dockerin | RCL01 | IV |
| Ga0196617_10004018  | GH9      | RCL01 | IV |
| Ga0196617_10004022  | GH18     | RCL01 | IV |
| Ga0196617_10004023  | dockerin | RCL01 | IV |
| Ga0196617_10004023  | dockerin | RCL01 | IV |
| Ga0196617_10004023  | GH8      | RCL01 | IV |
| Ga0196617_10004025  | CBM3     | RCL01 | IV |
| Ga0196617_10004046  | CBM35    | RCL01 | IV |
| Ga0196617_10004046  | PL11     | RCL01 | IV |
| Ga0196617_10004053  | dockerin | RCL01 | IV |
| Ga0196617_10004053  | dockerin | RCL01 | IV |
| Ga0196617_10004125  | CBM25    | RCL01 | IV |
| Ga0196617_10004148  | CBM35    | RCL01 | IV |
| Ga0196617_10004148  | CE12     | RCL01 | IV |
| Ga0196617_10004149  | CE12     | RCL01 | IV |
| Ga0196617_10004149  | dockerin | RCL01 | IV |
| Ga0196617_10004156  | dockerin | RCL01 | IV |
| Ga0196617_10004156  | dockerin | RCL01 | IV |
| Ga0196617_10004167  | SLH      | RCL01 | IV |
| Ga0196617_10004167  | SLH      | RCL01 | IV |
| Ga0196617_10004167  | SLH      | RCL01 | IV |
| Ga0196617_10004178  | GH130    | RCL01 | IV |
| Ga0196617_1000447   | SLH      | RCL01 | IV |
| Ga0196617_1000447   | SLH      | RCL01 | IV |
| Ga0196617_1000447   | SLH      | RCL01 | IV |
| Ga0196617_10004476  | cohesin  | RCL01 | IV |
| Ga0196617_10004476  | SLH      | RCL01 | IV |
| Ga0196617_10004476  | SLH      | RCL01 | IV |
| Ga0196617_10004476  | SLH      | RCL01 | IV |

|                    |          |       |    |
|--------------------|----------|-------|----|
| Ga0196617_1000451  | CBM6     | RCL01 | IV |
| Ga0196617_1000451  | dockerin | RCL01 | IV |
| Ga0196617_1000451  | dockerin | RCL01 | IV |
| Ga0196617_1000452  | CBM6     | RCL01 | IV |
| Ga0196617_1000452  | GH43     | RCL01 | IV |
| Ga0196617_10004521 | CBM35    | RCL01 | IV |
| Ga0196617_10004521 | GH124    | RCL01 | IV |
| Ga0196617_10004521 | PL1      | RCL01 | IV |
| Ga0196617_10004521 | PL9      | RCL01 | IV |
| Ga0196617_1000453  | CBM6     | RCL01 | IV |
| Ga0196617_1000453  | dockerin | RCL01 | IV |
| Ga0196617_1000453  | dockerin | RCL01 | IV |
| Ga0196617_10004533 | GH126    | RCL01 | IV |
| Ga0196617_10004546 | SLH      | RCL01 | IV |
| Ga0196617_10004546 | SLH      | RCL01 | IV |
| Ga0196617_10004546 | SLH      | RCL01 | IV |
| Ga0196617_1000455  | CBM6     | RCL01 | IV |
| Ga0196617_1000455  | dockerin | RCL01 | IV |
| Ga0196617_1000455  | dockerin | RCL01 | IV |
| Ga0196617_1000455  | GH43     | RCL01 | IV |
| Ga0196617_10004552 | CBM16    | RCL01 | IV |
| Ga0196617_10004553 | CBM3     | RCL01 | IV |
| Ga0196617_10004553 | GH5      | RCL01 | IV |
| Ga0196617_1000456  | CBM13    | RCL01 | IV |
| Ga0196617_1000456  | CBM62    | RCL01 | IV |
| Ga0196617_1000456  | CBM6     | RCL01 | IV |
| Ga0196617_1000456  | dockerin | RCL01 | IV |
| Ga0196617_1000456  | dockerin | RCL01 | IV |
| Ga0196617_1000456  | GH5      | RCL01 | IV |
| Ga0196617_1000458  | CBM48    | RCL01 | IV |
| Ga0196617_1000458  | CBM48    | RCL01 | IV |
| Ga0196617_1000458  | GH13     | RCL01 | IV |
| Ga0196617_1000459  | CE9      | RCL01 | IV |
| Ga0196617_10004620 | GH3      | RCL01 | IV |
| Ga0196617_10004621 | CBM3     | RCL01 | IV |
| Ga0196617_10004621 | CBM4     | RCL01 | IV |
| Ga0196617_10004635 | CBM6     | RCL01 | IV |
| Ga0196617_10004635 | CBM6     | RCL01 | IV |
| Ga0196617_10004635 | dockerin | RCL01 | IV |
| Ga0196617_10004635 | dockerin | RCL01 | IV |
| Ga0196617_10004635 | GH43     | RCL01 | IV |
| Ga0196617_10004637 | CBM42    | RCL01 | IV |
| Ga0196617_10006312 | CBM16    | RCL01 | IV |
| Ga0196617_10006312 | CBM16    | RCL01 | IV |
| Ga0196617_10006336 | SLH      | RCL01 | IV |
| Ga0196617_1000635  | dockerin | RCL01 | IV |
| Ga0196617_1000635  | GH9      | RCL01 | IV |
| Ga0196617_10006355 | CBM3     | RCL01 | IV |



|                    |          |       |    |
|--------------------|----------|-------|----|
| Ga0196617_10006355 | GH9      | RCL01 | IV |
| Ga0196617_10006356 | CBM3     | RCL01 | IV |
| Ga0196617_10006356 | CBM3     | RCL01 | IV |
| Ga0196617_10006356 | dockerin | RCL01 | IV |
| Ga0196617_10006356 | dockerin | RCL01 | IV |
| Ga0196617_10006356 | GH9      | RCL01 | IV |
| Ga0196617_1000636  | CBM35    | RCL01 | IV |
| Ga0196617_1000636  | GH26     | RCL01 | IV |
| Ga0196617_1000731  | CBM44    | RCL01 | IV |
| Ga0196617_1000731  | CBM44    | RCL01 | IV |
| Ga0196617_1000731  | SLH      | RCL01 | IV |
| Ga0196617_1000731  | SLH      | RCL01 | IV |
| Ga0196617_1000731  | SLH      | RCL01 | IV |
| Ga0196617_10007916 | CBM6     | RCL01 | IV |
| Ga0196617_10007916 | CE1      | RCL01 | IV |
| Ga0196617_10007916 | GH10     | RCL01 | IV |
| Ga0196617_10007950 | SLH      | RCL01 | IV |
| Ga0196617_10007951 | SLH      | RCL01 | IV |
| Ga0196617_10007951 | SLH      | RCL01 | IV |
| Ga0196617_10008049 | CBM6     | RCL01 | IV |
| Ga0196617_10008049 | GH30     | RCL01 | IV |
| Ga0196617_1000831  | CBM44    | RCL01 | IV |
| Ga0196617_1000831  | GH124    | RCL01 | IV |
| Ga0196617_10008313 | CE4      | RCL01 | IV |
| Ga0196617_10008321 | CBM6     | RCL01 | IV |
| Ga0196617_10008321 | CBM6     | RCL01 | IV |
| Ga0196617_10008321 | SLH      | RCL01 | IV |
| Ga0196617_10008321 | SLH      | RCL01 | IV |
| Ga0196617_1000954  | CBM22    | RCL01 | IV |
| Ga0196617_1000954  | dockerin | RCL01 | IV |
| Ga0196617_1000954  | dockerin | RCL01 | IV |
| Ga0196617_1000954  | GH10     | RCL01 | IV |
| Ga0196617_1000961  | CBM30    | RCL01 | IV |
| Ga0196617_1000961  | CBM4     | RCL01 | IV |
| Ga0196617_10009628 | dockerin | RCL01 | IV |
| Ga0196617_1000968  | dockerin | RCL01 | IV |
| Ga0196617_1000968  | dockerin | RCL01 | IV |
| Ga0196617_1000968  | GH5      | RCL01 | IV |
| Ga0196617_1000969  | CBM3     | RCL01 | IV |
| Ga0196617_10009710 | SLH      | RCL01 | IV |
| Ga0196617_10009710 | SLH      | RCL01 | IV |
| Ga0196617_10009729 | CBM50    | RCL01 | IV |
| Ga0196617_10010619 | SLH      | RCL01 | IV |
| Ga0196617_10010619 | SLH      | RCL01 | IV |
| Ga0196617_10010641 | AA6      | RCL01 | IV |
| Ga0196617_10010817 | GH23     | RCL01 | IV |
| Ga0196617_1001211  | CBM42    | RCL01 | IV |
| Ga0196617_1001211  | GH43     | RCL01 | IV |

|                    |          |       |    |
|--------------------|----------|-------|----|
| Ga0196617_10012123 | CBM35    | RCL01 | IV |
| Ga0196617_10012123 | dockerin | RCL01 | IV |
| Ga0196617_10012123 | dockerin | RCL01 | IV |
| Ga0196617_10012123 | GH26     | RCL01 | IV |
| Ga0196617_10012132 | CBM3     | RCL01 | IV |
| Ga0196617_10012132 | CBM3     | RCL01 | IV |
| Ga0196617_10012132 | GH9      | RCL01 | IV |
| Ga0196617_10012135 | CBM3     | RCL01 | IV |
| Ga0196617_10012135 | dockerin | RCL01 | IV |
| Ga0196617_10012135 | dockerin | RCL01 | IV |
| Ga0196617_10012135 | GH9      | RCL01 | IV |
| Ga0196617_10012136 | dockerin | RCL01 | IV |
| Ga0196617_10012136 | dockerin | RCL01 | IV |
| Ga0196617_10012516 | CBM3     | RCL01 | IV |
| Ga0196617_10012516 | dockerin | RCL01 | IV |
| Ga0196617_10012516 | dockerin | RCL01 | IV |
| Ga0196617_10012516 | GH9      | RCL01 | IV |
| Ga0196617_1001259  | dockerin | RCL01 | IV |
| Ga0196617_1001259  | dockerin | RCL01 | IV |
| Ga0196617_1001259  | GH5      | RCL01 | IV |
| Ga0196617_10012616 | GH94     | RCL01 | IV |
| Ga0196617_10012633 | CBM50    | RCL01 | IV |
| Ga0196617_10012633 | CBM50    | RCL01 | IV |
| Ga0196617_10012633 | CBM50    | RCL01 | IV |
| Ga0196617_10012633 | CBM50    | RCL01 | IV |
| Ga0196617_10012634 | CBM50    | RCL01 | IV |
| Ga0196617_10012634 | CBM50    | RCL01 | IV |
| Ga0196617_10012634 | CBM50    | RCL01 | IV |
| Ga0196617_10012635 | CBM50    | RCL01 | IV |
| Ga0196617_10012635 | CBM50    | RCL01 | IV |
| Ga0196617_10012711 | SLH      | RCL01 | IV |
| Ga0196617_10012711 | SLH      | RCL01 | IV |
| Ga0196617_10012711 | SLH      | RCL01 | IV |
| Ga0196617_10012713 | CE6      | RCL01 | IV |
| Ga0196617_10012729 | GH18     | RCL01 | IV |
| Ga0196617_1001275  | GH5      | RCL01 | IV |
| Ga0196617_10012833 | CBM3     | RCL01 | IV |
| Ga0196617_1001361  | CE3      | RCL01 | IV |
| Ga0196617_1001361  | CE3      | RCL01 | IV |
| Ga0196617_1001361  | dockerin | RCL01 | IV |
| Ga0196617_1001361  | dockerin | RCL01 | IV |
| Ga0196617_10013629 | CBM50    | RCL01 | IV |
| Ga0196617_1001363  | CE2      | RCL01 | IV |
| Ga0196617_1001363  | GH5      | RCL01 | IV |
| Ga0196617_1001365  | CBM34    | RCL01 | IV |
| Ga0196617_1001365  | GH13     | RCL01 | IV |
| Ga0196617_10013919 | GH16     | RCL01 | IV |
| Ga0196617_10013921 | GH1      | RCL01 | IV |

|                     |          |       |    |
|---------------------|----------|-------|----|
| Ga0196617_10014113  | CE10     | RCL01 | IV |
| Ga0196617_10014123  | CE14     | RCL01 | IV |
| Ga0196617_1001491   | cohesin  | RCL01 | IV |
| Ga0196617_1001491   | cohesin  | RCL01 | IV |
| Ga0196617_1001491   | SLH      | RCL01 | IV |
| Ga0196617_1001491   | SLH      | RCL01 | IV |
| Ga0196617_1001491   | SLH      | RCL01 | IV |
| Ga0196617_1001492   | cohesin  | RCL01 | IV |
| Ga0196617_1001492   | SLH      | RCL01 | IV |
| Ga0196617_1001492   | SLH      | RCL01 | IV |
| Ga0196617_1001492   | SLH      | RCL01 | IV |
| Ga0196617_10014924  | CBM16    | RCL01 | IV |
| Ga0196617_10015118  | CE4      | RCL01 | IV |
| Ga0196617_10019112  | GH109    | RCL01 | IV |
| Ga0196617_10019617  | CBM3     | RCL01 | IV |
| Ga0196617_10019617  | CBM3     | RCL01 | IV |
| Ga0196617_10019617  | GH9      | RCL01 | IV |
| Ga0196617_1002189   | CBM35    | RCL01 | IV |
| Ga0196617_1002189   | PL1      | RCL01 | IV |
| Ga0196617_1002401   | CBM3     | RCL01 | IV |
| Ga0196617_1002401   | cohesin  | RCL01 | IV |
| Ga0196617_1002401   | cohesin  | RCL01 | IV |
| Ga0196617_1002401   | cohesin  | RCL01 | IV |
| Ga0196617_1002401   | cohesin  | RCL01 | IV |
| Ga0196617_10024516  | CE4      | RCL01 | IV |
| Ga0196617_10024517  | CBM6     | RCL01 | IV |
| Ga0196617_10024517  | dockerin | RCL01 | IV |
| Ga0196617_10024517  | GH11     | RCL01 | IV |
| Ga0196617_10024518  | CBM6     | RCL01 | IV |
| Ga0196617_10024518  | dockerin | RCL01 | IV |
| Ga0196617_10024518  | dockerin | RCL01 | IV |
| Ga0196617_10024518  | GH11     | RCL01 | IV |
| Ga0196617_1002738   | CE10     | RCL01 | IV |
| Ga0196617_1005678   | CE7      | RCL01 | IV |
| Ga0196617_1008234   | GH109    | COPR1 | IV |
| Ga0196617_100004299 | AA6      | TISS1 | IV |
| Ga0196617_100012177 | CBM50    | TISS1 | IV |
| Ga0196617_1000123   | AA6      | TISS1 | IV |
| Ga0196617_100005248 | CBM22    | CLOS1 | IV |
| Ga0196617_100005248 | CBM22    | CLOS1 | IV |
| Ga0196617_100005248 | CBM9     | CLOS1 | IV |
| Ga0196617_100005248 | GH10     | CLOS1 | IV |
| Ga0196617_10000543  | GH130    | CLOS1 | IV |
| Ga0196617_1006694   | GH115    | CLOS1 | IV |
| Ga0196617_1008072   | GH43     | CLOS1 | IV |
| Ga0196617_1010211   | GH4      | CLOS1 | IV |
| Ga0196617_1004561   | GH109    | COPR2 | IV |
| Ga0196617_1002048   | CBM54    | COPR3 | IV |

|                                    |       |               |    |
|------------------------------------|-------|---------------|----|
| Ga0196617_1002048                  | SLH   | COPR3         | IV |
| Ga0196617_1002048                  | SLH   | COPR3         | IV |
| Ga0196617_1002048                  | SLH   | COPR3         | IV |
| Ga0196617_1002716                  | GH109 | COPR3         | IV |
| Ga0196617_10004021+Ga0187557_10122 | CBM3  | BWF2A + CLOS1 | IV |
| Ga0187564_1232                     | GH18  | SW3C          | IV |
| Ga0196617_1005697                  | GH73  | COPR1         | V  |
| Ga0196617_100010102                | GH109 | TISS1         | V  |
| Ga0196617_10001093                 | GH109 | TISS1         | V  |
| Ga0196617_10001250                 | CBM50 | TISS1         | V  |
| Ga0196617_10001250                 | CBM50 | TISS1         | V  |
| Ga0196617_10001250                 | CBM50 | TISS1         | V  |
| Ga0196617_10000516                 | GH2   | CLOS1         | V  |
| Ga0196617_100005270                | SLH   | CLOS1         | V  |
| Ga0196617_10001198                 | SLH   | CLOS1         | V  |
| Ga0196617_10001198                 | SLH   | CLOS1         | V  |
| Ga0196617_100018135                | CE4   | CLOS1         | V  |
| Ga0196617_10003852                 | GH95  | CLOS1         | V  |
| Ga0196617_10012046                 | GH109 | CLOS1         | V  |
| Ga0187564_102193                   | CE1   | SW3C          | V  |
| Ga0187564_10318                    | GH109 | SW3C          | V  |
| Ga0187564_10322                    | CE9   | SW3C          | V  |
| Ga0196617_10006310                 | GH5   | RCL01         | VI |
| Ga0196617_1000638                  | CBM4  | RCL01         | VI |
| Ga0196617_1000638                  | CBM4  | RCL01         | VI |
| Ga0196617_1000638                  | CBM4  | RCL01         | VI |
| Ga0196617_1000638                  | CBM4  | RCL01         | VI |
| Ga0196617_1000638                  | CBM54 | RCL01         | VI |
| Ga0196617_1000638                  | GH16  | RCL01         | VI |
| Ga0196617_1000638                  | SLH   | RCL01         | VI |
| Ga0196617_1000638                  | SLH   | RCL01         | VI |
| Ga0196617_1000638                  | SLH   | RCL01         | VI |
| Ga0196617_10006233                 | GH57  | COPR1         | VI |
| Ga0196617_10006234                 | GH57  | COPR1         | VI |
| Ga0196617_10006619                 | GH23  | COPR1         | VI |
| Ga0196617_10006658                 | GH13  | COPR1         | VI |
| Ga0196617_1001466                  | GH23  | COPR1         | VI |
| Ga0196617_10018610                 | CE14  | COPR1         | VI |
| Ga0196617_1002859                  | GH74  | COPR1         | VI |
| Ga0196617_10031312                 | CE4   | COPR1         | VI |
| Ga0196617_1003146                  | SLH   | COPR1         | VI |
| Ga0196617_1003797                  | GH109 | COPR1         | VI |
| Ga0196617_1003936                  | CE1   | COPR1         | VI |
| Ga0196617_1006193                  | SLH   | COPR1         | VI |
| Ga0196617_1006193                  | SLH   | COPR1         | VI |
| Ga0196617_1006193                  | SLH   | COPR1         | VI |
| Ga0196617_1006445                  | GH109 | COPR1         | VI |
| Ga0196617_1009463                  | CE9   | COPR1         | VI |

|                     |       |       |    |
|---------------------|-------|-------|----|
| Ga0196617_10000713  | CE10  | TISS1 | VI |
| Ga0196617_100007288 | GH3   | TISS1 | VI |
| Ga0196617_100007296 | CE4   | TISS1 | VI |
| Ga0196617_10000769  | CE1   | TISS1 | VI |
| Ga0196617_10001084  | AA3   | TISS1 | VI |
| Ga0196617_10001251  | CBM50 | TISS1 | VI |
| Ga0196617_10001251  | CBM50 | TISS1 | VI |
| Ga0196617_10001251  | CBM50 | TISS1 | VI |
| Ga0196617_10001251  | CBM50 | TISS1 | VI |
| Ga0196617_1000286   | CE10  | TISS1 | VI |
| Ga0196617_10003113  | GH18  | TISS1 | VI |
| Ga0196617_10004218  | CBM50 | TISS1 | VI |
| Ga0196617_10004240  | CE4   | TISS1 | VI |
| Ga0196617_10005416  | GH109 | TISS1 | VI |
| Ga0196617_10005467  | GH23  | TISS1 | VI |
| Ga0196617_1000051   | GH51  | CLOS1 | VI |
| Ga0196617_10000512  | GH29  | CLOS1 | VI |
| Ga0196617_100005134 | CE4   | CLOS1 | VI |
| Ga0196617_100005144 | GH43  | CLOS1 | VI |
| Ga0196617_10000517  | CE15  | CLOS1 | VI |
| Ga0196617_100005175 | GH31  | CLOS1 | VI |
| Ga0196617_10000518  | GH95  | CLOS1 | VI |
| Ga0196617_100005181 | CBM25 | CLOS1 | VI |
| Ga0196617_100005183 | GH9   | CLOS1 | VI |
| Ga0196617_100005190 | AA6   | CLOS1 | VI |
| Ga0196617_100005192 | GH51  | CLOS1 | VI |
| Ga0196617_100005195 | SLH   | CLOS1 | VI |
| Ga0196617_100005195 | SLH   | CLOS1 | VI |
| Ga0196617_100005195 | SLH   | CLOS1 | VI |
| Ga0196617_10000520  | GH42  | CLOS1 | VI |
| Ga0196617_100005203 | GH2   | CLOS1 | VI |
| Ga0196617_10000521  | SLH   | CLOS1 | VI |
| Ga0196617_100005216 | CBM50 | CLOS1 | VI |
| Ga0196617_100005269 | SLH   | CLOS1 | VI |
| Ga0196617_100005269 | SLH   | CLOS1 | VI |
| Ga0196617_1000053   | GH109 | CLOS1 | VI |
| Ga0196617_10000534  | GH35  | CLOS1 | VI |
| Ga0196617_10000548  | SLH   | CLOS1 | VI |
| Ga0196617_10000548  | SLH   | CLOS1 | VI |
| Ga0196617_10000548  | SLH   | CLOS1 | VI |
| Ga0196617_1000055   | GH36  | CLOS1 | VI |
| Ga0196617_1000056   | GH36  | CLOS1 | VI |
| Ga0196617_10000567  | GH13  | CLOS1 | VI |
| Ga0196617_10000568  | GH36  | CLOS1 | VI |
| Ga0196617_1000057   | GH105 | CLOS1 | VI |
| Ga0196617_10000579  | GH10  | CLOS1 | VI |
| Ga0196617_1000058   | GH3   | CLOS1 | VI |
| Ga0196617_10000586  | GH43  | CLOS1 | VI |

|                     |       |       |    |
|---------------------|-------|-------|----|
| Ga0196617_10000587  | GH95  | CLOS1 | VI |
| Ga0196617_1000059   | GH31  | CLOS1 | VI |
| Ga0196617_100006113 | CE10  | CLOS1 | VI |
| Ga0196617_100006118 | GH43  | CLOS1 | VI |
| Ga0196617_100006212 | CE8   | CLOS1 | VI |
| Ga0196617_100006223 | CE3   | CLOS1 | VI |
| Ga0196617_100006228 | CBM22 | CLOS1 | VI |
| Ga0196617_100006228 | GH30  | CLOS1 | VI |
| Ga0196617_10000638  | GH18  | CLOS1 | VI |
| Ga0196617_10000669  | GH88  | CLOS1 | VI |
| Ga0196617_10000695  | GH109 | CLOS1 | VI |
| Ga0196617_100011115 | CBM50 | CLOS1 | VI |
| Ga0196617_100011143 | CE10  | CLOS1 | VI |
| Ga0196617_100011180 | GH3   | CLOS1 | VI |
| Ga0196617_10001122  | GH36  | CLOS1 | VI |
| Ga0196617_10001140  | SLH   | CLOS1 | VI |
| Ga0196617_10001140  | SLH   | CLOS1 | VI |
| Ga0196617_10001140  | SLH   | CLOS1 | VI |
| Ga0196617_10001148  | GH109 | CLOS1 | VI |
| Ga0196617_100015121 | GH106 | CLOS1 | VI |
| Ga0196617_10001539  | GH67  | CLOS1 | VI |
| Ga0196617_10001577  | CE4   | CLOS1 | VI |
| Ga0196617_10001596  | CE15  | CLOS1 | VI |
| Ga0196617_10001596  | SLH   | CLOS1 | VI |
| Ga0196617_10001596  | SLH   | CLOS1 | VI |
| Ga0196617_10001596  | SLH   | CLOS1 | VI |
| Ga0196617_100018109 | GH133 | CLOS1 | VI |
| Ga0196617_100018129 | GH2   | CLOS1 | VI |
| Ga0196617_10001814  | CBM50 | CLOS1 | VI |
| Ga0196617_10001830  | CE4   | CLOS1 | VI |
| Ga0196617_10001838  | CE4   | CLOS1 | VI |
| Ga0196617_10001876  | CE7   | CLOS1 | VI |
| Ga0196617_100020114 | GH112 | CLOS1 | VI |
| Ga0196617_100020115 | GH127 | CLOS1 | VI |
| Ga0196617_100020127 | GH63  | CLOS1 | VI |
| Ga0196617_10002017  | CBM50 | CLOS1 | VI |
| Ga0196617_1000203   | CBM16 | CLOS1 | VI |
| Ga0196617_10002031  | GH109 | CLOS1 | VI |
| Ga0196617_10002032  | CBM37 | CLOS1 | VI |
| Ga0196617_10002032  | SLH   | CLOS1 | VI |
| Ga0196617_10002032  | SLH   | CLOS1 | VI |
| Ga0196617_10002032  | SLH   | CLOS1 | VI |
| Ga0196617_10002033  | CBM48 | CLOS1 | VI |
| Ga0196617_10002033  | CBM48 | CLOS1 | VI |
| Ga0196617_10002033  | GH13  | CLOS1 | VI |
| Ga0196617_10002040  | GH29  | CLOS1 | VI |
| Ga0196617_10002041  | GH95  | CLOS1 | VI |
| Ga0196617_10002055  | GH109 | CLOS1 | VI |

|                    |       |       |    |
|--------------------|-------|-------|----|
| Ga0196617_10002065 | GH43  | CLOS1 | VI |
| Ga0196617_10002092 | GH109 | CLOS1 | VI |
| Ga0196617_10002712 | CBM6  | CLOS1 | VI |
| Ga0196617_10002712 | GH2   | CLOS1 | VI |
| Ga0196617_1000274  | GH23  | CLOS1 | VI |
| Ga0196617_10002765 | GH109 | CLOS1 | VI |
| Ga0196617_10002766 | GH38  | CLOS1 | VI |
| Ga0196617_10002776 | GH105 | CLOS1 | VI |
| Ga0196617_10002777 | CE12  | CLOS1 | VI |
| Ga0196617_10002778 | GH105 | CLOS1 | VI |
| Ga0196617_10002780 | GH5   | CLOS1 | VI |
| Ga0196617_10002785 | CBM67 | CLOS1 | VI |
| Ga0196617_10002785 | GH78  | CLOS1 | VI |
| Ga0196617_1000344  | CE9   | CLOS1 | VI |
| Ga0196617_10003461 | GH2   | CLOS1 | VI |
| Ga0196617_10003466 | GH106 | CLOS1 | VI |
| Ga0196617_10003498 | GH38  | CLOS1 | VI |
| Ga0196617_10003636 | GH43  | CLOS1 | VI |
| Ga0196617_10003637 | GH43  | CLOS1 | VI |
| Ga0196617_10003643 | CE9   | CLOS1 | VI |
| Ga0196617_10003684 | CBM50 | CLOS1 | VI |
| Ga0196617_10003684 | CBM50 | CLOS1 | VI |
| Ga0196617_10003849 | GH15  | CLOS1 | VI |
| Ga0196617_10003870 | GH3   | CLOS1 | VI |
| Ga0196617_10003871 | SLH   | CLOS1 | VI |
| Ga0196617_10003880 | GH2   | CLOS1 | VI |
| Ga0196617_10005513 | CE1   | CLOS1 | VI |
| Ga0196617_10005912 | GH28  | CLOS1 | VI |
| Ga0196617_10005913 | GH105 | CLOS1 | VI |
| Ga0196617_10005914 | GH43  | CLOS1 | VI |
| Ga0196617_10005958 | GH39  | CLOS1 | VI |
| Ga0196617_10005959 | GH95  | CLOS1 | VI |
| Ga0196617_10006041 | GH130 | CLOS1 | VI |
| Ga0196617_1000651  | CBM50 | CLOS1 | VI |
| Ga0196617_10006515 | PL9   | CLOS1 | VI |
| Ga0196617_10006557 | GH73  | CLOS1 | VI |
| Ga0196617_10006557 | SLH   | CLOS1 | VI |
| Ga0196617_10006740 | PL12  | CLOS1 | VI |
| Ga0196617_10007036 | CBM50 | CLOS1 | VI |
| Ga0196617_10007036 | CBM50 | CLOS1 | VI |
| Ga0196617_10007036 | GH18  | CLOS1 | VI |
| Ga0196617_10007049 | GH94  | CLOS1 | VI |
| Ga0196617_1000758  | GH1   | CLOS1 | VI |
| Ga0196617_10007720 | GH109 | CLOS1 | VI |
| Ga0196617_10007733 | SLH   | CLOS1 | VI |
| Ga0196617_10007733 | SLH   | CLOS1 | VI |
| Ga0196617_10007748 | GH4   | CLOS1 | VI |
| Ga0196617_10007750 | CBM66 | CLOS1 | VI |

|                    |          |       |    |
|--------------------|----------|-------|----|
| Ga0196617_10007750 | PL11     | CLOS1 | VI |
| Ga0196617_10009210 | CE1      | CLOS1 | VI |
| Ga0196617_10009212 | GH13     | CLOS1 | VI |
| Ga0196617_10009249 | GH2      | CLOS1 | VI |
| Ga0196617_10010336 | GH106    | CLOS1 | VI |
| Ga0196617_10010340 | SLH      | CLOS1 | VI |
| Ga0196617_1001112  | GH42     | CLOS1 | VI |
| Ga0196617_10011120 | GH3      | CLOS1 | VI |
| Ga0196617_10011122 | GH130    | CLOS1 | VI |
| Ga0196617_10011128 | GH88     | CLOS1 | VI |
| Ga0196617_10011135 | CBM67    | CLOS1 | VI |
| Ga0196617_10011135 | GH78     | CLOS1 | VI |
| Ga0196617_10011136 | GH3      | CLOS1 | VI |
| Ga0196617_10011620 | GH43     | CLOS1 | VI |
| Ga0196617_10011622 | CE10     | CLOS1 | VI |
| Ga0196617_10011624 | GH105    | CLOS1 | VI |
| Ga0196617_1001205  | GH4      | CLOS1 | VI |
| Ga0196617_10015018 | GH51     | CLOS1 | VI |
| Ga0196617_10015028 | SLH      | CLOS1 | VI |
| Ga0196617_10015029 | CE4      | CLOS1 | VI |
| Ga0196617_1001561  | dockerin | CLOS1 | VI |
| Ga0196617_1001562  | SLH      | CLOS1 | VI |
| Ga0196617_1001562  | SLH      | CLOS1 | VI |
| Ga0196617_1001562  | SLH      | CLOS1 | VI |
| Ga0196617_10015626 | GH4      | CLOS1 | VI |
| Ga0196617_1001563  | GH4      | CLOS1 | VI |
| Ga0196617_10016319 | CE7      | CLOS1 | VI |
| Ga0196617_10016826 | SLH      | CLOS1 | VI |
| Ga0196617_1001793  | GH120    | CLOS1 | VI |
| Ga0196617_10019216 | CBM50    | CLOS1 | VI |
| Ga0196617_10019320 | CBM6     | CLOS1 | VI |
| Ga0196617_1002031  | GH109    | CLOS1 | VI |
| Ga0196617_1002039  | CBM54    | CLOS1 | VI |
| Ga0196617_1002039  | SLH      | CLOS1 | VI |
| Ga0196617_1002039  | SLH      | CLOS1 | VI |
| Ga0196617_1002039  | SLH      | CLOS1 | VI |
| Ga0196617_10022112 | PL22     | CLOS1 | VI |
| Ga0196617_10022114 | GH18     | CLOS1 | VI |
| Ga0196617_10022114 | SLH      | CLOS1 | VI |
| Ga0196617_10022114 | SLH      | CLOS1 | VI |
| Ga0196617_1002911  | GH23     | CLOS1 | VI |
| Ga0196617_10029410 | GH10     | CLOS1 | VI |
| Ga0196617_1004705  | GH35     | CLOS1 | VI |
| Ga0196617_1005872  | SLH      | CLOS1 | VI |
| Ga0187557_1002153  | CE9      | BWF2A | VI |
| Ga0187557_1002195  | CE4      | BWF2A | VI |
| Ga0187557_1002239  | SLH      | BWF2A | VI |
| Ga0187557_1002239  | SLH      | BWF2A | VI |



|                                                      |       |                         |      |
|------------------------------------------------------|-------|-------------------------|------|
| Ga0187557_1002239                                    | SLH   | BWF2A                   | VI   |
| Ga0187557_100243                                     | GH57  | BWF2A                   | VI   |
| Ga0187557_100286                                     | CE14  | BWF2A                   | VI   |
| Ga0187557_1003196                                    | CE1   | BWF2A                   | VI   |
| Ga0187557_1003298                                    | GH109 | BWF2A                   | VI   |
| Ga0187557_100357                                     | SLH   | BWF2A                   | VI   |
| Ga0187557_100357                                     | SLH   | BWF2A                   | VI   |
| Ga0187557_1004109                                    | GH23  | BWF2A                   | VI   |
| Ga0187557_100472                                     | GH13  | BWF2A                   | VI   |
| Ga0187557_100494                                     | CE4   | BWF2A                   | VI   |
| Ga0187557_10055                                      | SLH   | BWF2A                   | VI   |
| Ga0187564_10115                                      | SLH   | SW3C                    | VI   |
| Ga0187564_10115                                      | SLH   | SW3C                    | VI   |
| Ga0187564_10115                                      | SLH   | SW3C                    | VI   |
| Ga0187564_10665                                      | SLH   | SW3C                    | VI   |
| Ga0187564_10665                                      | SLH   | SW3C                    | VI   |
| Ga0187564_10665                                      | SLH   | SW3C                    | VI   |
| Ga0187564_1086                                       | SLH   | SW3C                    | VI   |
| Ga0187557_100244+Ga0187564_103146                    | GH57  | SW3C + BWF2A            | VI   |
| Ga0187564_101173+Ga0187557_1001187                   | CE1   | SW3C + BWF2A            | VI   |
| Ga0187564_10433+Ga0187557_100434                     | GH23  | SW3C + BWF2A            | VI   |
| Ga0187557_1003195+Ga0196617_1003937+Ga0187564_102192 | CE10  | SW3C + BWF2A + COPR1    | VI   |
| Ga0187564_10247+Ga0196617_1005403+Ga0187557_100347   | GH74  | SW3C + BWF2A + COPR1    | VI   |
| Ga0187564_10674+Ga0187557_1002248+Ga0196617_1003705  | GH16  | SW3C + BWF2A + Unbinned | VI   |
| Ga0187564_10675+Ga0187557_1002249+Ga0196617_1003704  | GH3   | SW3C + BWF2A + Unbinned | VI   |
| Ga0196617_10009442+Ga0187564_10367                   | CBM66 | SW3C + COPR1            | VI   |
| Ga0187564_10357+Ga0196617_1014501                    | CE4   | SW3C + Unbinned         | VI   |
| Ga0196617_10006346                                   | AA6   | RCL01                   | VII  |
| Ga0196617_10021811                                   | CE8   | RCL01                   | VII  |
| Ga0196617_100004229                                  | CBM50 | TISS1                   | VII  |
| Ga0196617_10001282                                   | AA3   | TISS1                   | VII  |
| Ga0196617_10002881                                   | CE4   | TISS1                   | VII  |
| Ga0196617_10002771                                   | GH105 | CLOS1                   | VII  |
| Ga0196617_10019218                                   | GH18  | CLOS1                   | VII  |
| Ga0196617_1008651                                    | CBM6  | RCL01                   | VIII |
| Ga0196617_1008651                                    | GH2   | RCL01                   | VIII |
| Ga0196617_1006112                                    | CE4   | COPR1                   | VIII |
| Ga0196617_1008452                                    | CE4   | COPR1                   | VIII |
| Ga0196617_100006226                                  | SLH   | CLOS1                   | VIII |
| Ga0196617_100006226                                  | SLH   | CLOS1                   | VIII |
| Ga0196617_100006226                                  | SLH   | CLOS1                   | VIII |
| Ga0196617_100006227                                  | GH10  | CLOS1                   | VIII |
| Ga0196617_10001149                                   | GH31  | CLOS1                   | VIII |
| Ga0196617_1005975                                    | CBM35 | CLOS1                   | VIII |
| Ga0196617_1005975                                    | GH26  | CLOS1                   | VIII |
| Ga0196617_1007811                                    | CBM32 | CLOS1                   | VIII |
| Ga0196617_1007811                                    | PL12  | CLOS1                   | VIII |
| Ga0196617_1008533                                    | GH130 | CLOS1                   | VIII |

|                                     |          |              |      |
|-------------------------------------|----------|--------------|------|
| Ga0196617_1003511                   | GH109    | COPR2        | VIII |
| Ga0196617_1002713                   | PL12     | COPR3        | VIII |
| Ga0196617_1002715                   | PL12     | COPR3        | VIII |
| Ga0187557_100130                    | SLH      | BWF2A        | VIII |
| Ga0187557_100130                    | SLH      | BWF2A        | VIII |
| Ga0187557_100130                    | SLH      | BWF2A        | VIII |
| Ga0187557_1002251                   | CBM35    | BWF2A        | n.a. |
| Ga0187557_1002251                   | GH18     | BWF2A        | n.a. |
| Ga0187557_100245                    | GH57     | BWF2A        | n.a. |
| Ga0187557_10084                     | GH8      | BWF2A        | n.a. |
| Ga0187557_10091                     | Dockerin | BWF2A        | n.a. |
| Ga0187557_10091                     | Dockerin | BWF2A        | n.a. |
| Ga0187557_10091                     | GH9      | BWF2A        | n.a. |
| Ga0187557_10201                     | CBM3     | BWF2A        | n.a. |
| Ga0187557_10212                     | Dockerin | BWF2A        | n.a. |
| Ga0187557_10212                     | GH8      | BWF2A        | n.a. |
| Ga0196617_10006232+Ga0187564_103145 | GH57     | SW3C + COPR1 | n.a. |
| Ga0187564_102275                    | GH73     | SW3C         | n.a. |
| Ga0187564_10616                     | CE4      | SW3C         | n.a. |
| Ga0187564_1133                      | GH9      | SW3C         | n.a. |
| Ga0187564_1292                      | CBM3     | SW3C         | n.a. |

59 **Supplementary Table 7. Genome IMG ID and SRA numbers for datasets used in this**  
60 **study**

| Dataset                       | SRA Accession number | IMG Genome ID |
|-------------------------------|----------------------|---------------|
| <b>Metagenomes</b>            |                      |               |
| SEM1b_D1B                     | SRX3777359           | 3300019285    |
| SEM1b_D2B                     | SRX3777360           | 3300019285    |
| SEM1b_D1B-r1 (16S rRNA)       | SRX3777358           |               |
| SEM1b_D2B-r1 (16S rRNA)       | SRX3777363           |               |
| SEM1b_D1B-r2 (16S rRNA)       | SRX3777361           |               |
| SEM1b_D2B-r2 (16S rRNA)       | SRX3777362           |               |
| <b>Isolate genomes</b>        |                      |               |
| <i>C. proteolyticus BWF2A</i> | SAMN08667745         | 2731957509    |
| <i>C. proteolyticus SW3C</i>  | SAMN08667746         | 2731957514    |
| <b>SEM1b time series</b>      |                      |               |
| Dataset                       | Metatranscriptomes   | 16S rRNA      |
| SEM1b_T1A                     |                      | SRX3777365    |
| SEM1b_T1B                     |                      | SRX3777364    |
| SEM1b_T1C                     |                      | SRX3777357    |
| SEM1b_T2A                     | SRX3777356           | SRX3777346    |
| SEM1b_T2B                     | SRX3777345           | SRX3777348    |
| SEM1b_T2C                     | SRX3777347           | SRX3777350    |
| SEM1b_T3A                     | SRX3777349           | SRX3777352    |
| SEM1b_T3B                     | SRX3777351           | SRX3777354    |
| SEM1b_T3C                     | SRX3777353           | SRX3777368    |
| SEM1b_T4A                     | SRX3777369           | SRX3777370    |
| SEM1b_T4B                     | SRX3777371           | SRX3777372    |
| SEM1b_T4C                     | SRX3777373           | SRX3777374    |
| SEM1b_T5A                     | SRX3777375           | SRX3777366    |
| SEM1b_T5B                     | SRX3777367           | SRX3777344    |
| SEM1b_T5C                     | SRX3777343           | SRX3777342    |
| SEM1b_T6A                     | SRX3777341           | SRX3777340    |
| SEM1b_T6B                     | SRX3777339           | SRX3777338    |
| SEM1b_T6C                     | SRX3777337           | SRX3777336    |
| SEM1b_T7A                     | SRX3777335           | SRX3777384    |
| SEM1b_T7B                     | SRX3777385           | SRX3777382    |
| SEM1b_T7C                     | SRX3777383           | SRX3777380    |
| SEM1b_T8A                     | SRX3777381           | SRX3777378    |
| SEM1b_T8B                     | SRX3777379           | SRX3777376    |
| SEM1b_T8C                     | SRX3777377           | SRX3777355    |

61  
62

63 **REFERENCES.**

64

65 Azizi A, Kim W, Lee JH (2016). Comparison of microbial communities during the anaerobic  
66 digestion of Gracilaria under mesophilic and thermophilic conditions. *World Journal of*  
67 *Microbiology and Biotechnology* **32**: 1-17.

68

69 Chen Y, Zhang F, Wang T, Shen N, Yu ZW, Zeng RJ (2016). Hydraulic retention time affects  
70 stable acetate production from tofu processing wastewater in extreme-thermophilic  
71 (70 °C) mixed culture fermentation. *Bioresource Technology* **216**: 722-728.

72

73 Chen Y, Xiao K, Jiang X, Shen N, Zeng RJ, Zhou Y (2017). In-situ sludge pretreatment in a  
74 single-stage anaerobic digester. *Bioresource Technology* **238**: 102-108.

75

76 Fitamo T, Treu L, Boldrin A, Sartori C, Angelidaki I, Scheutz C (2017). Microbial population  
77 dynamics in urban organic waste anaerobic co-digestion with mixed sludge during a  
78 change in feedstock composition and different hydraulic retention times. *Water Research*  
79 **118**: 261-271.

80

81 Gagliano MC, Braguglia CM, Gianico A, Mininni G, Nakamura K, Rossetti S (2015).  
82 Thermophilic anaerobic digestion of thermal pretreated sludge: Role of microbial  
83 community structure and correlation with process performances. *Water Research* **68**: 498-  
84 509.

85

86 Hagen LH, Frank JA, Zamanzadeh M, Eijsink VGH, Pope PB, Horn SJ *et al* (2017).  
87 Quantitative metaproteomics highlight the metabolic contributions of uncultured  
88 phylotypes in a thermophilic anaerobic digester. *Applied and Environmental Microbiology*  
89 **83**.

90

91 Ho D, Jensen P, Gutierrez-Zamora ML, Beckmann S, Manefield M, Batstone D (2016). High-  
92 rate, high temperature acetotrophic methanogenesis governed by a three population  
93 consortium in anaerobic bioreactors. *PLoS ONE* **11**: 1-13.

94

95 Kobayashi T, Li YY, Harada H (2008). Analysis of microbial community structure and  
96 diversity in the thermophilic anaerobic digestion of waste activated sludge. *Water Science*  
97 *and Technology* **57**: 1199-1205.

98

99 Kouzuma A, Tsutsumi M, Ishii Si, Ueno Y, Abe T, Watanabe K (2017). Non-autotrophic  
100 methanogens dominate in anaerobic digesters. *Scientific Reports* **7**: 1-13.

101

102 Lü F, Bize A, Guillot A, Monnet V, Madigou C, Chapleur O *et al* (2014). Metaproteomics of  
103 cellulose methanisation under thermophilic conditions reveals a surprisingly high  
104 proteolytic activity. *ISME Journal* **8**: 88-102.

105

106 Pervin HM, Dennis PG, Lim HJ, Tyson GW, Batstone DJ, Bond PL (2013). Drivers of microbial  
107 community composition in mesophilic and thermophilic temperature-phased anaerobic  
108 digestion pre-treatment reactors. *Water Research* **47**: 7098-7108.  
109  
110 Sun W, Yu G, Louie T, Liu T, Zhu C, Xue G *et al* (2015). From mesophilic to thermophilic  
111 digestion: the transitions of anaerobic bacterial, archaeal, and fungal community structures  
112 in sludge and manure samples. *Applied Microbiology and Biotechnology* **99**: 10271-10282.  
113  
114 Yu B, Lou Z, Zhang D, Shan A, Yuan H, Zhu N *et al* (2015). Variations of organic matters and  
115 microbial community in thermophilic anaerobic digestion of waste activated sludge with  
116 the addition of ferric salts. *Bioresour Technol* **179**: 291-298.  
117  
118
